# Supplementary material
Source: bioRxiv or medRxiv preprint supplement (https://www.biorxiv.org/highwire/filestream/85770/field_highwire_adjunct_files/0/108738-1.pdf)
Supplement: Supplementary file [file 108738-1.pdf]

# Supplemental Material

## 1. Text. Overview

We compared the common model of information spaces based on CHA to a common model based on response hyperalignment (RHA)[16]. Comparison of the effects of CHA and RHA on ISC of representational geometry and bsMVPC of movie time-segments showed that, whereas alignment of connectivity profiles was slightly better after CHA than after RHA (Supplementary Figure S1), alignment of patterns of response was slightly better after RHA than after CHA (Supplementary Figures S2 and S3). We also illustrate the fine-grain structure in group mean connectivity patterns after CHA (Figure 7), and in Supplementary Figure 4 we show all individual connectivity patterns in the same left lateral-occipital/inferior-temporal cortical field with connectivity targets in left mid fusiform and mid superior temporal sulcus cortices. Supplementary Table S1 show the coordinates used as the centers of functional ROIs used to quantify results in Figures 2, 3, and 4, Supplementary Table S2 lists the tasks and task contrasts from the HCP database used in Figure 6.

## 2. Figures S1, S2, and S3. Comparison of CHA and RHA

**ISC of connectivity profiles**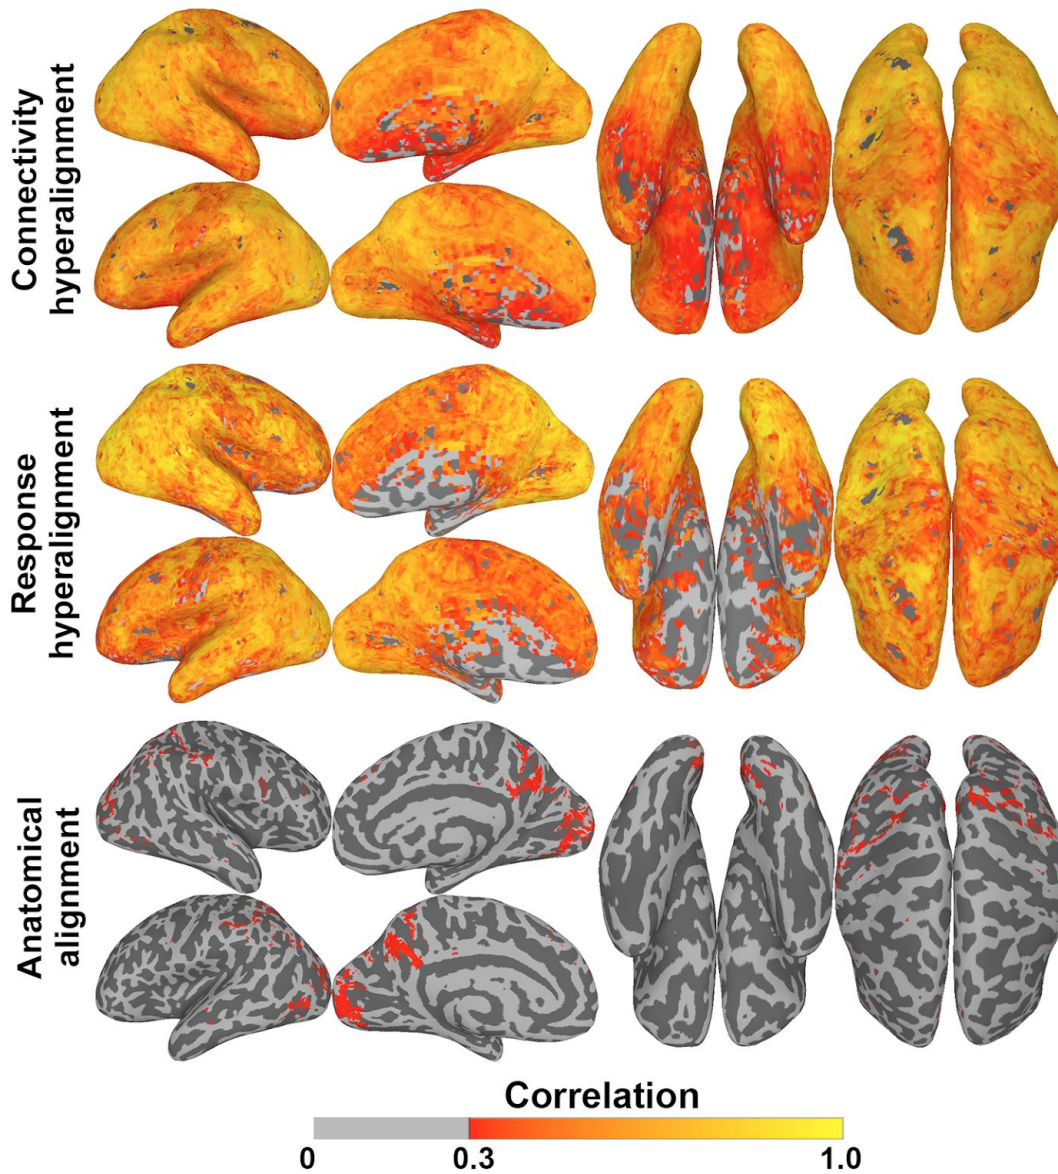

Supplementary Figure S1. ISC of connectivity profiles calculated from responses to the movie.

ISCs of representational geometry in each voxel are mapped onto cortical surfaces after CHA, RHA, and anatomical alignment, RHA, and CHA. Maps of ISCs after CHA and anatomical alignment are identical to maps shown in Fig 2 and are reproduced here to facilitate comparison to RHA.

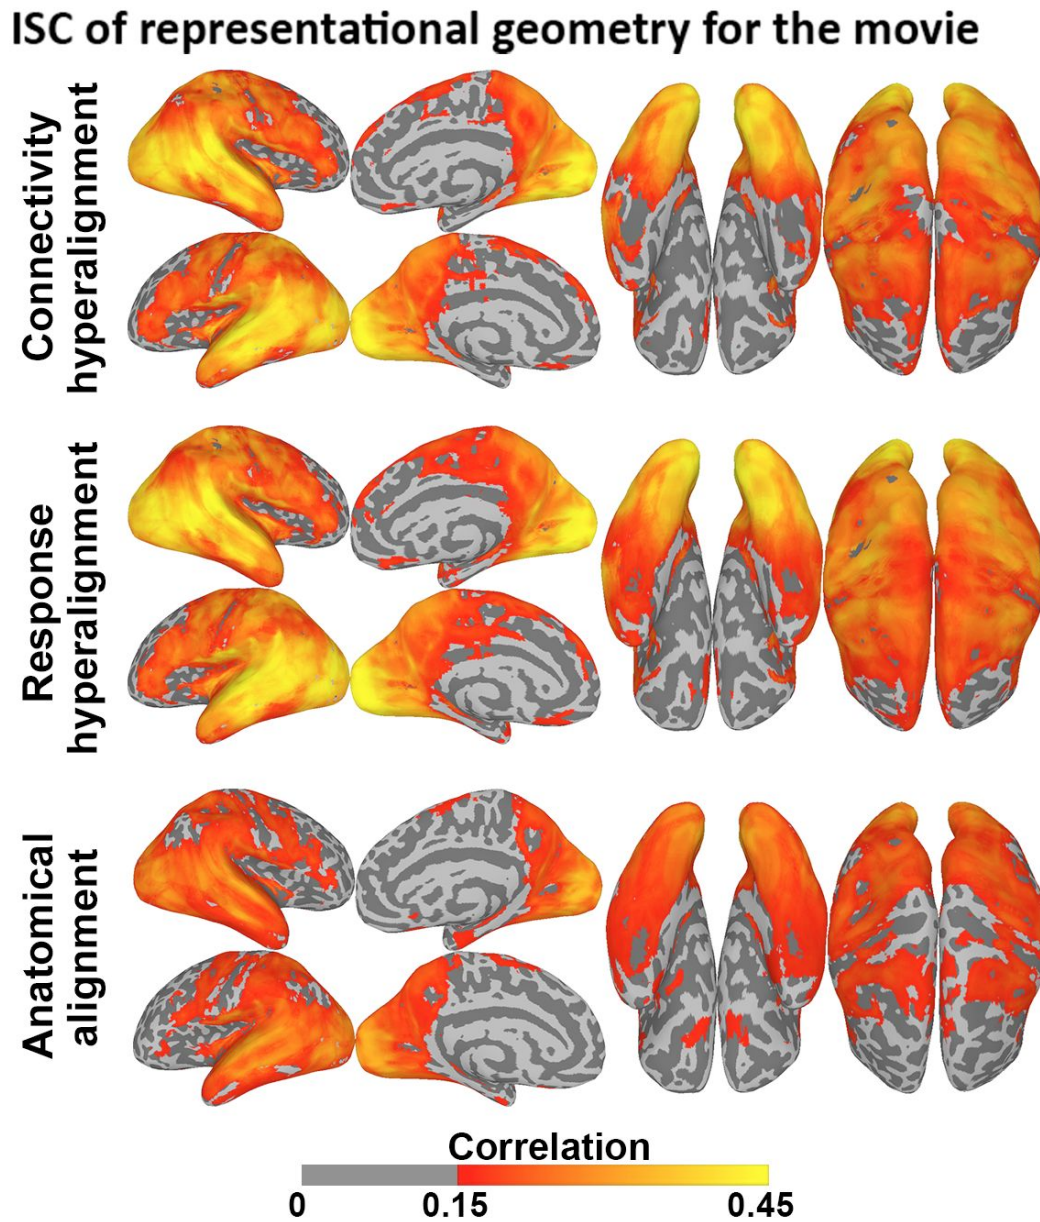

Supplementary Figure S2. ISC of representational geometries in the responses to movie time-points. ISCs of representational geometry in each voxel are mapped onto cortical surfaces after CHA, RHA, and anatomical alignment, RHA, and CHA. Maps of ISCs after CHA and anatomical alignment are identical to maps shown in Fig 5 and are reproduced here to facilitate comparison to RHA.



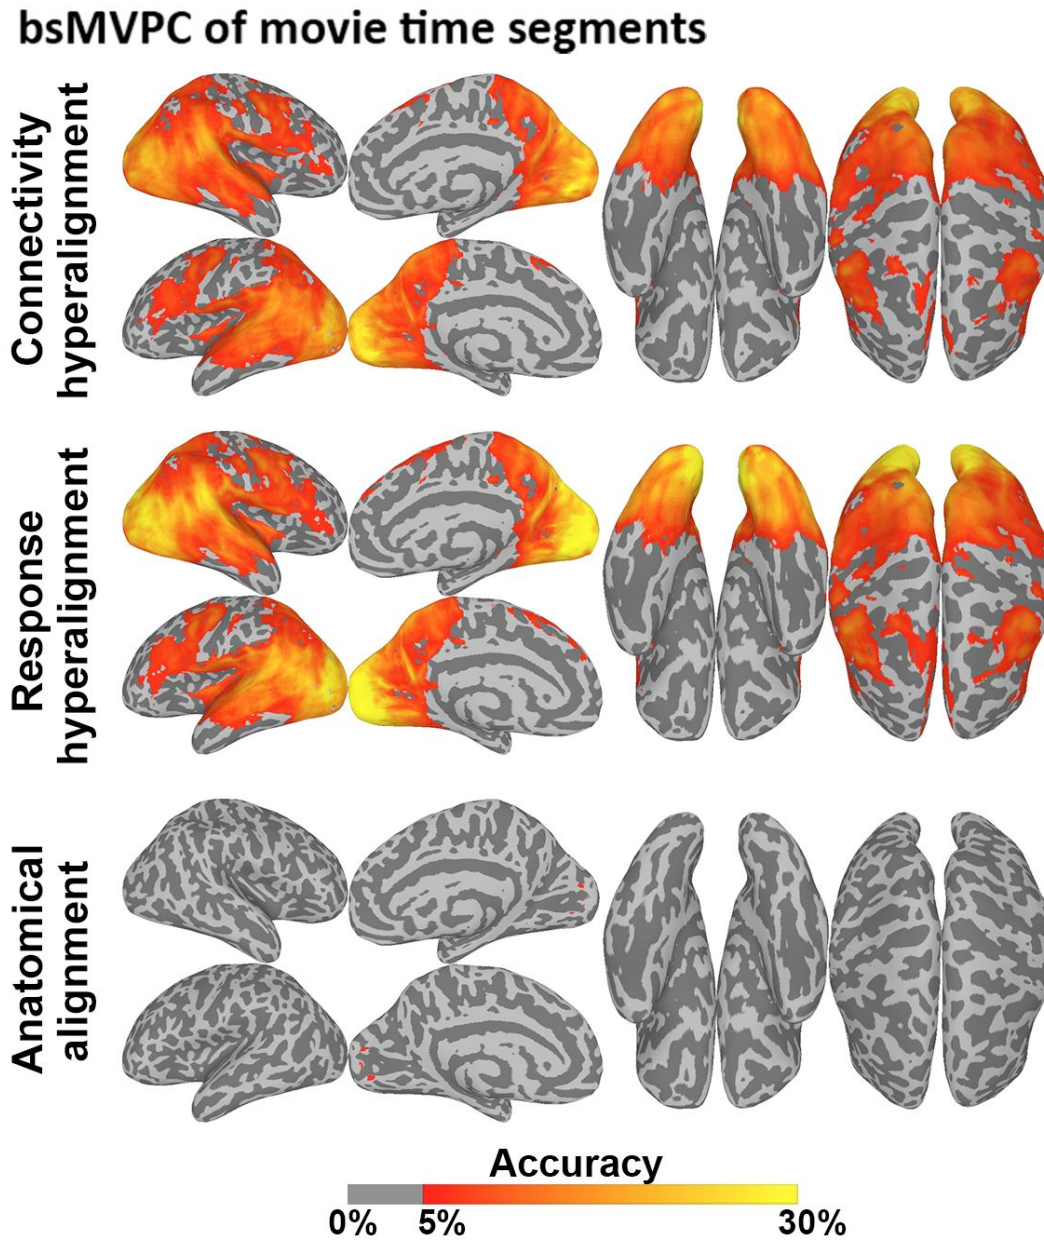

Supplementary Figure S3. Between-subject classification of movie segments. Classification accuracies in each searchlight mapped on cortical surfaces after CHA, RHA, and anatomical alignment.

## 3. Figure S4. Illustration of fine-grained structure of connectivity patterns.

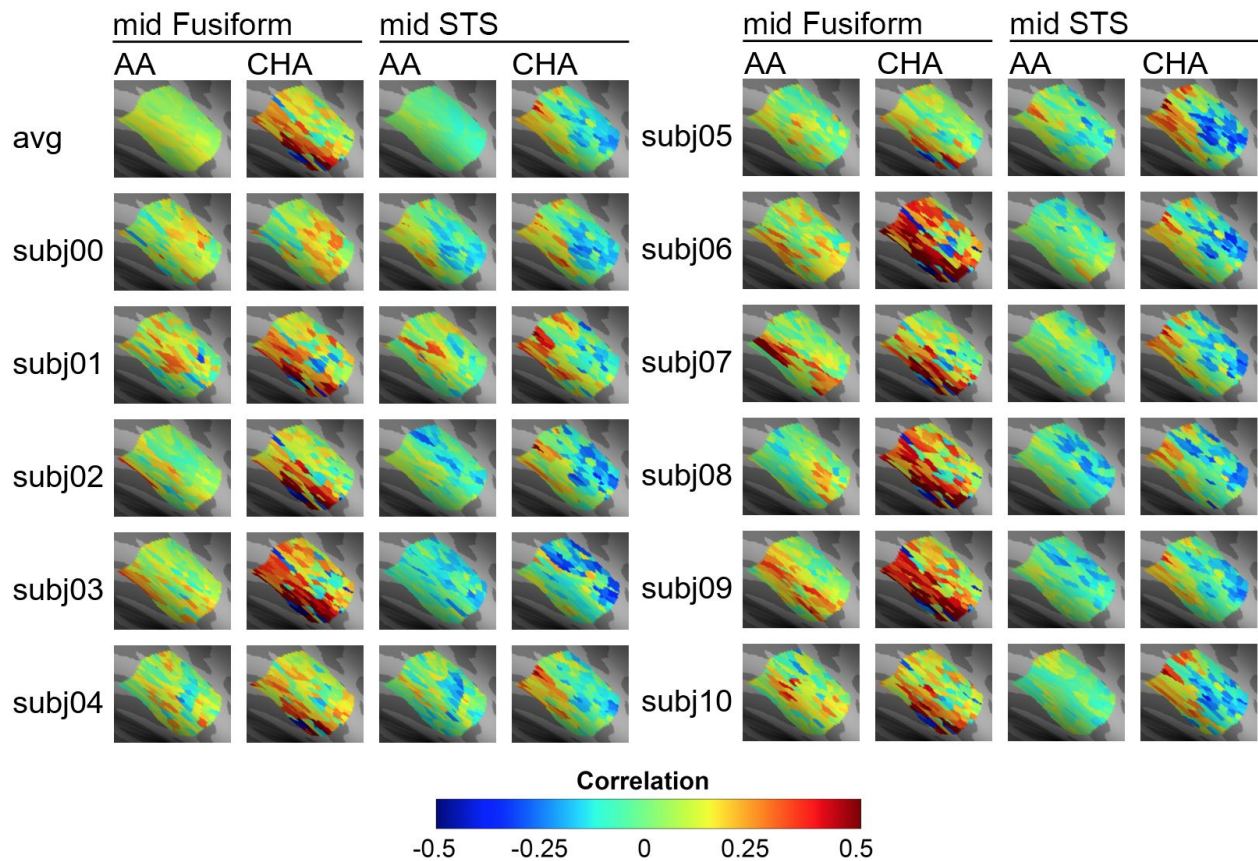

Supplementary Figure S4. Individual connectivity patterns in a left

lateral-occipital/inferior-temporal cortical field for connectivities with targets in left mid lateral fusiform gyrus and left mid superior temporal sulcus. Connectivity patterns are shown for anatomically-aligned data and data transformed into the common model connectome.

Connectivities are correlations between time series responses to the movie. CHA transformation matrices were derived from independent data from the other movie half. Group mean connectivity patterns are shown in the first row for comparison (also shown in Figure 7).

## 4. Supplementary Tables

Supplementary Table 1. Selected cortical loci implicated in visual, auditory, cognitive, and social functions from Neurosynth.

| Search Term           | Hemisphere | MNI Coordinates (x, y, z) |     |     |
|-----------------------|------------|---------------------------|-----|-----|
| Visual                |            |                           |     |     |
| V1                    | Left       | -4                        | -82 | -4  |
|                       | Right      | 10                        | -94 | 2   |
| MT                    | Left       | -42                       | -72 | 2   |
|                       | Right      | 44                        | -66 | 2   |
| Visual word form area | Left       | -46                       | -60 | -14 |
| FFA                   | Left       | -42                       | -52 | -20 |
|                       | Right      | 40                        | -50 | -22 |
| Scenes (PPA)          | Left       | -26                       | -46 | -10 |
|                       | Right      | 34                        | -38 | -12 |
| Auditory              |            |                           |     |     |
| Primary Auditory (A1) | Left       | -44                       | -30 | 10  |
|                       | Right      | 52                        | -14 | 4   |
| Voice                 | Left       | -60                       | -14 | 0   |
|                       | Right      | 60                        | -4  | -12 |
| Music                 | Left       | -52                       | -14 | 0   |
|                       | Right      | 60                        | -20 | 4   |
| Cognitive             |            |                           |     |     |
| Calculations          | Left       | -30                       | -66 | 38  |
|                       | Right      | 34                        | -64 | 44  |
| Broca's area          | Left       | -52                       | 14  | 12  |
| Working memory        | Left       | -44                       | 26  | 24  |
|                       | Right      | 44                        | 42  | 26  |

| Social    |       |     |     |    |
|-----------|-------|-----|-----|----|
| MPFC      |       | 6   | 54  | 14 |
| TPJ       | Left  | 50  | -52 | 22 |
|           | Right | -52 | -56 | 22 |
| Precuneus |       | 0   | -56 | 40 |

V1 - primary visual cortex, MT - middle temporal visual motion area, FFA - fusiform face area, PPA - parahippocampal place area, MPFC - medial prefrontal cortex, TPJ - temporoparietal junction.

Supplementary Table 2. Task maps used from the HCP data.

| Experiment/Task     | Maps                                                                                                                                                                  |
|---------------------|-----------------------------------------------------------------------------------------------------------------------------------------------------------------------|
| MOTOR               | CUE, LF, LH, RF, RH, T, CUE-AVG, LF-AVG, LH-AVG, RF-AVG, RH-AVG, T-AVG                                                                                                |
| LANGUAGE            | MATH, STORY, MATH-STORY                                                                                                                                               |
| WM (Working Memory) | 2BK_BODY, 2BK_FACE, 2BK_PLACE, 2BK_TOOL, 0BK_BODY, 0BK_FACE, 0BK_PLACE, 0BK_TOOL, 2BK, 0BK, 2BK-0BK, BODY, FACE, PLACE, TOOL, BODY-AVG, FACE-AVG, PLACE-AVG, TOOL-AVG |
| RELATIONAL          | MATH, REL, MATCH-REL                                                                                                                                                  |
| EMOTION             | FACES, SHAPES, FACES-SHAPES                                                                                                                                           |
| SOCIAL              | RANDOM, TOM, TOM-RANDOM                                                                                                                                               |
| GAMBLING            | PUNISH, REWARD, PUNISH-REWARD                                                                                                                                         |

LF - Left Finger, RH - Right Hand, 2BK - Two-Back, TOM - Theory Of Mind
